# Supplementary material for: New mutations found by Next-Generation Sequencing screening of Spanish patients with Nemaline Myopathy
Source: PubMed Central journal article supplement (PMC6281284; doi:10.1371/journal.pone.0207296), 2018-12-05
Supplement: pone.0207296.s002.pdf [file pone.0207296.s002.pdf]

| Gene          | Reference    | Exon    | Primers          | Sequence from 5' to 3'                               | Size (pb) |
|---------------|--------------|---------|------------------|------------------------------------------------------|-----------|
| <b>NEB</b>    | NM_004543    | 19-20   | 19_20D<br>19_20R | CTTGGAGAATTAATAGCTCC<br>GGAAGTTCATCTTCCTTTAG         | 645       |
| <b>NEB</b>    | NM_004543    | 24      | 24D<br>24R       | GTGAGAATATAAACGCATCA<br>GTCTAACACAACCTTCCTC          | 423       |
| <b>NEB</b>    | NM_004543    | 27      | 27D<br>27R       | ACACTGTTGTTCTTATCATT<br>CAGCAGTACTTTTGTGAATG         | 488       |
| <b>NEB</b>    | NM_004543    | 57      | 57D<br>57R       | GAGGATAAGATCAAGGATGC<br>CTTTGTGGAATAATGGTGCC         | 672       |
| <b>NEB</b>    | NM_004543    | 61      | 61D<br>61R       | GCAAGTTAGGCTTAGTGATT<br>CGATAAAGGCAATGCATTTG         | 509       |
| <b>NEB</b>    | NM_004543    | 71      | 72D<br>72R       | CCGATAAGTCCTTTAACAG<br>GTAGTTTGTAGTATGTGTAG          | 405       |
| <b>NEB</b>    | NM_004543    | 74      | 74D<br>74R       | GAATGTGAACCTATGAAACA<br>CAGAACATTATCCTAAAGAG         | 508       |
| <b>NEB</b>    | NM_004543    | 85      | 86D<br>86R       | GATACTGGACCAGGTATGGG<br>GAAAAGTGAGCAGGTACTION        | 416       |
| <b>NEB</b>    | NM_004543    | 93      | 93D<br>93R       | CTAGAGATACTGATCTATATGGG<br>CTTAGGGTGGATTCTTATACC     | 468       |
| <b>NEB</b>    | NM_004543    | 112     | 113D<br>113R     | CCTCTTCTGAAATTCTCCAG<br>GCCATGTATGATTTCCAGAGC        | 261       |
| <b>NEB</b>    | NM_004543    | 124     | 124D<br>124R     | TAGTGTGGGTTGCAGGACA<br>CCACAGAGGAATTAGAGTGACCA       | 720       |
| <b>NEB</b>    | NM_004543    | 133     | 134D<br>134R     | GTCAAATGAATGAGTCCCTC<br>GATCTGAAGAATCTCTAAGG         | 316       |
| <b>NEB</b>    | NM_004543    | 149     | 149D<br>149R     | GACATCACTCAGCTGCTAAAC<br>CTTATAATCATGTTTGCACATATC    | 257       |
| <b>NEB</b>    | NM_001164508 | 84      | 84D<br>84R       | CCAGAAGTATCTGTACACC<br>GCTTCTAGCACAGGATGAG           | 412       |
| <b>NEB</b>    | NM_001164508 | 105     | 105D<br>105R     | GGAGATGGAGTTAGTTTGAG<br>GAGAGTTGTGTTTCAGAGC          | 475       |
| <b>NEB</b>    | NM_001164508 | 135     | 135D<br>135R     | CAATATGACATGAATCCCTTAAATG<br>GCCTTGTGGAGTAATTCAGTTTG | 246       |
| <b>ACTA1</b>  | NM_001100    | 6       | 6D<br>6R         | GAGTGAGGGCTCCTCTCCTG<br>CTGGAGGTGGAGTGTGTCTAG        | 740       |
| <b>LMOD3</b>  | NM_001304418 | 1       | 1D<br>1R         | TGTGTTAACTGGGACACTCG<br>TGGAGTCTTGAGAAATCACAGTT      | 1440      |
| <b>LMOD3</b>  | NM_001304418 | 2       | 2AD<br>2AR       | TGGGATAGAATAACCACCCATT<br>CCAACATGTGCCTCTGATTG       | 2400      |
| <b>LMOD3</b>  | NM_001304418 | 2       | 2BD<br>2BR       | TCACAGGTAAAGGGATTGTGG<br>GGTAATGCTCATTGGCTTCC        | 2400      |
| <b>LMOD3</b>  | NM_001304418 | 3       | 3D<br>3R         | CCTATTCTGTATCTTTAAGGCATGT<br>GGTGGGAACTGAAAATCTCC    | 1324      |
| <b>KLHL40</b> | NM_152393    | 1       | 1AD<br>1AR       | GGGGCTGAGTCAAGTCTTTCT<br>ACTGCCTCCTCTTCTCCAC         | 1980      |
| <b>KLHL40</b> | NM_152393    | 1       | 1BD<br>1BR       | TTCATCTGCGCTCACTTCAC<br>TCAGTCAACCTCCCCAGTCT         | 1980      |
| <b>KLHL40</b> | NM_152393    | 2       | 2D<br>2R         | CATAGCTGGACCTCCCTCAC<br>GCCACCTTCACTCTAAGCA          | 1080      |
| <b>KLHL40</b> | NM_152393    | 3 and 4 | 3_4D<br>3_4R     | GGGTGGGATCAAAGAACTGA<br>GTCCCTGAATGAGGAACCTG         | 1260      |
| <b>KLHL40</b> | NM_152393    | 5       | 5D<br>5R         | ACTTGATTGCAAAGGGTTG<br>GGCTATTCCTCCCTACAGGA          | 1020      |
| <b>KLHL41</b> | NM_006063    | 1       | 1D<br>1R         | CCTGCCACAGATGCTGTAGTT<br>CATGCTCATCCAGACAATGC        | 1200      |
| <b>KLHL41</b> | NM_006063    | 2       | 2D<br>2R         | TTGCATGTTGGGAAAATCTG<br>CTCCCAAAGTGCTGGGATTA         | 660       |
| <b>KLHL41</b> | NM_006063    | 3       | 3D<br>3R         | CCCCTCCCACATCCTAAT<br>TCATGACAAGCAAAGCCAAA           | 600       |
| <b>KLHL41</b> | NM_006063    | 4 and 5 | 4_5D<br>4_5R     | AAAGAAAAGAGGAAGAAACCTTC<br>TGGGGTTGTAGTTTTATTACTGTG  | 900       |
