# Supplementary material for: New mutations found by Next-Generation Sequencing screening of Spanish patients with Nemaline Myopathy
Source: PubMed Central journal article supplement (PMC6281284; doi:10.1371/journal.pone.0207296), 2018-12-05
Supplement: pone.0207296.s003.pdf [file pone.0207296.s003.pdf]

| Patient                                              |                 | 1                                         | 2                                 | 4                             | 5                                         |                       |                           |
|------------------------------------------------------|-----------------|-------------------------------------------|-----------------------------------|-------------------------------|-------------------------------------------|-----------------------|---------------------------|
| Gene                                                 |                 | NEB                                       |                                   | NEB                           | NEB                                       | ACTA1                 |                           |
| Locus                                                |                 | chr2:152424649_152424650                  | chr2:152473973                    | chr2:152394412                | chr2:152424649_152424650                  | chr2:152547236        | chr1:229567587            |
| Exon                                                 |                 | 113                                       | 75                                | 140                           | 113                                       | 24                    | 6                         |
| Sequence variants                                    |                 | c.17779_17780delTA<br>(p.Tyr5927HisfsX17) | c.11086A>C<br>(p.Thr3696Pro)      | c.21076C>T<br>(p.Arg7026Ter)  | c.17779_17780delTA<br>(p.Tyr5927HisfsX17) | c.2310+5G>A           | c.871A>T<br>(p.Ile291Phe) |
| State                                                |                 | heterozygote                              | heterozygote                      | heterozygote                  | heterozygote                              | heterozygote          | heterozygote              |
| RefSeq                                               |                 | NM_001271208.1                            | NM_001271208.1                    | NM_001271208.1                | NM_001271208.1                            | NM_001271208.1        | NM_001100.3               |
| European<br>(non-finnish)<br>Population<br>Frequency | gnomAD          | NF                                        | NF                                | 0,01%                         | NF                                        | NF                    | NF                        |
|                                                      | ExAC            | NF                                        | NF                                | NF                            | NF                                        | NF                    | NF                        |
| Predictors <i>in silico</i>                          | Mutation taster | DC                                        | DC                                | DC                            | DC                                        | DC                    | DC                        |
|                                                      | SIFT            | -                                         | T                                 | -                             | -                                         | *                     | P                         |
|                                                      | Polyphen-2      | -                                         | PxD                               | -                             | -                                         | *                     | PxD                       |
| References                                           |                 | <i>novel</i>                              | <i>novel</i>                      | Lehtokari <i>et al</i> , 2014 | <i>novel</i>                              | <i>novel</i>          | Laing <i>et al</i> , 2009 |
| ACMG evidence of pathogenicity                       |                 | Pathogenic                                | Variant of Uncertain Significance | Pathogenic                    | Pathogenic                                | Pathogenic            | Pathogenic                |
| Inheritance                                          |                 | Inherited from father                     | Inherited from mother             | Inherited from father         | Inherited from mother                     | Inherited from father | <i>de novo</i>            |

NF=Not found      P= Pathogenic      B=Benign      PrD=Probably Damaging  
DC= Disease causing      T= Tolerated      N=Neutral      PsD= Possibly Damaging

\*Splicing predictors corresponding to this variant are shown in Table 4.
